# Supplementary material
Source: publisher site journal article supplement (https://www.dovepress.com/article/378666)
Supplement: Supplementary file 1 [file get_supplementary_file.php]

Supplementary Table 1. The top 200 genes positively correlated with UBD.

| Gene Symbol | Gene Title | Entrez Gene |
| --- | --- | --- |
| CXCL11 | chemokine (C-X-C motif) ligand 11 | 6373 |
| COL12A1 | collagen; type XII; alpha 1 | 1303 |
| CTHRC1 | collagen triple helix repeat containing 1 | 115908 |
| COL13A1 | collagen; type XIII; alpha 1 | 1305 |
| PHTF2 | putative homeodomain transcription factor 2 | 57157 |
| EGFL6 | EGF-like-domain; multiple 6 | 25975 |
| CD47 | CD47 molecule | 961 |
| PPT1 | palmitoyl-protein thioesterase 1 (ceroid-lipofuscinosis; neuronal 1; infantile) | 5538 |
| BCAT1 | branched chain aminotransferase 1; cytosolic | 586 |
| LARP6 | La ribonucleoprotein domain family; member 6 | 55323 |
| SPON2 | spondin 2; extracellular matrix protein | 10417 |
| WNT2 | wingless-type MMTV integration site family member 2 | 7472 |
| BGN | biglycan | 633 |
| USP31 | ubiquitin specific peptidase 31 | 57478 |
| LGALS1 | lectin; galactoside-binding; soluble; 1 (galectin 1) | 3956 |
| CCL8 | chemokine (C-C motif) ligand 8 | 6355 |
| ZBTB20 | Zinc finger and BTB domain containing 20 | 26137 |
| COL6A3 | collagen; type VI; alpha 3 | 1293 |
| MFAP2 | microfibrillar-associated protein 2 | 4237 |
| TAP1 | transporter 1; ATP-binding cassette; sub-family B (MDR/TAP) | 6890 |
| FCGR3A | Fc fragment of IgG; low affinity IIIa; receptor (CD16a), Fc fragment of IgG; low affinity IIIb; receptor (CD16b) | 2214, 2215 |
| CHN1 | chimerin (chimaerin) 1 | 1123 |
| FAM130A1 | family with sequence similarity 130; member A1 | 81566 |
| WNT5A | wingless-type MMTV integration site family; member 5A | 7474 |
| CTSK | cathepsin K | 1513 |
| GZMB | granzyme B (granzyme 2; cytotoxic T-lymphocyte-associated serine esterase 1) | 3002 |
| FBXL10 | F-box and leucine-rich repeat protein 10 | 84678 |
| CXCL9 | chemokine (C-X-C motif) ligand 9 | 4283 |
| SULF1 | sulfatase 1 | 23213 |
| PKD2 | polycystic kidney disease 2 (autosomal dominant) | 5311 |
| STX2 | syntaxin 2 | 2054 |
| MYBL1 | v-myb myeloblastosis viral oncogene homolog (avian)-like 1 | 4603 |
| KCTD20 | Potassium channel tetramerisation domain containing 20 | 222658 |
| TWIST1 | twist homolog 1 (acrocephalosyndactyly 3; Saethre-Chotzen syndrome) (Drosophila) | 7291 |
| GLIS2 | GLIS family zinc finger 2 | 84662 |
| KLHL5 | kelch-like 5 (Drosophila) | 51088 |
| WARS | tryptophanyl-tRNA synthetase | 7453 |
| SEMA3A | sema domain; immunoglobulin domain (Ig); short basic domain; secreted; (semaphorin) 3A | 10371 |
| GPR176 | G protein-coupled receptor 176 | 11245 |
| HNT | neurotrimin | 50863 |
| ADAMTS12 | ADAM metallopeptidase with thrombospondin type 1 motif; 12 | 81792 |
| UCHL1 | ubiquitin carboxyl-terminal esterase L1 (ubiquitin thiolesterase) | 7345 |
| TRPV2 | transient receptor potential cation channel; subfamily V; member 2 | 51393 |
| OLFML2A | olfactomedin-like 2A | 169611 |
| GPX4 | glutathione peroxidase 4 (phospholipid hydroperoxidase) | 2879 |
| NOX4 | NADPH oxidase 4 | 50507 |
| PDGFRB | platelet-derived growth factor receptor; beta polypeptide | 5159 |
| COL5A2 | collagen; type V; alpha 2 | 1290 |
| TSPAN9 | tetraspanin 9 | 10867 |
| DSE | dermatan sulfate epimerase | 29940 |
| DCBLD1 | discoidin; CUB and LCCL domain containing 1 | 285761 |
| PCOLCE | procollagen C-endopeptidase enhancer | 5118 |
| HOMER3 | homer homolog 3 (Drosophila) | 9454 |
| RAB6IP1 | RAB6 interacting protein 1 | 23258 |
| THY1 | Thy-1 cell surface antigen | 7070 |
| MYH10 | myosin; heavy chain 10; non-muscle | 4628 |
| CST1 | cystatin SN | 1469 |
| COL5A1 | collagen; type V; alpha 1 | 1289 |
| PLAU | plasminogen activator; urokinase | 5328 |
| DTD1 | D-tyrosyl-tRNA deacylase 1 homolog (S. cerevisiae) | 92675 |
| THBS2 | thrombospondin 2 | 7058 |
| TMEM132A | transmembrane protein 132A | 54972 |
| COL3A1 | collagen; type III; alpha 1 (Ehlers-Danlos syndrome type IV; autosomal dominant) | 1281 |
| APBA2 | amyloid beta (A4) precursor protein-binding; family A; member 2 (X11-like) | 321 |
| COL6A1 | collagen; type VI; alpha 1 | 1291 |
| MME | membrane metallo-endopeptidase | 4311 |
| FNDC1 | fibronectin type III domain containing 1 | 84624 |
| IGFBP7 | insulin-like growth factor binding protein 7 | 3490 |
| GPR124 | G protein-coupled receptor 124 | 25960 |
| DKK3 | dickkopf homolog 3 (Xenopus laevis) | 27122 |
| LOC401097 | Similar to LOC166075 | 401097 |
| NID2 | nidogen 2 (osteonidogen) | 22795 |
| TJAP1 | tight junction associated protein 1 (peripheral) | 93643 |
| RAI14 | retinoic acid induced 14 | 26064 |
| TBK1 | TANK-binding kinase 1 | 29110 |
| NOTCH3 | Notch homolog 3 (Drosophila) | 4854 |
| GUCY1A3 | guanylate cyclase 1; soluble; alpha 3 | 2982 |
| GBP5 | guanylate binding protein 5 | 115362 |
| MMD | monocyte to macrophage differentiation-associated | 23531 |
| COL8A1 | collagen; type VIII; alpha 1 | 1295 |
| JUB | jub; ajuba homolog (Xenopus laevis) | 84962 |
| TLE3 | transducin-like enhancer of split 3 (E(sp1) homolog; Drosophila) | 7090 |
| PDPN | podoplanin | 10630 |
| LAMC1 | laminin; gamma 1 (formerly LAMB2) | 3915 |
| FSTL1 | follistatin-like 1 | 11167 |
| INHBA | inhibin; beta A | 3624 |
| SSH1 | Slingshot homolog 1 (Drosophila) | 54434 |
| TMEM166 | transmembrane protein 166 | 84141 |
| GPM6B | glycoprotein M6B | 2824 |
| FCGR3B | Fc fragment of IgG; low affinity IIIb; receptor (CD16b) | 2215 |
| GPC6 | glypican 6 | 10082 |
| ZNF281 | Zinc finger protein 281 | 23528 |
| NRP2 | neuropilin 2 | 8828 |
| EML1 | echinoderm microtubule associated protein like 1 | 2009 |
| TTC7B | tetratricopeptide repeat domain 7B | 145567 |
| FCGR2A | Fc fragment of IgG; low affinity IIa; receptor (CD32) | 2212 |
| COL6A2 | collagen; type VI; alpha 2 | 1292 |
| MKX | mohawk homeobox | 283078 |
| PGF | placental growth factor; vascular endothelial growth factor-related protein | 5228 |
| RNF8 | ring finger protein 8 | 9025 |
| BICC1 | bicaudal C homolog 1 (Drosophila) | 80114 |
| COL1A2 | Collagen; type I; alpha 2 | 1278 |
| ST6GALNAC5 | ST6 (alpha-N-acetyl-neuraminyl-2;3-beta-galactosyl-1;3)-N-acetylgalactosaminide alpha-2;6-sialyltransferase 5 | 81849 |
| WWC2 | WW and C2 domain containing 2 | 80014 |
| ARL13B | ADP-ribosylation factor-like 13B | 200894 |
| GNB4 | guanine nucleotide binding protein (G protein); beta polypeptide 4 | 59345 |
| TMEM67 | transmembrane protein 67 | 91147 |
| TUBB6 | tubulin; beta 6 | 84617 |
| AEBP1 | AE binding protein 1 | 165 |
| GBP1 | guanylate binding protein 1; interferon-inducible; 67kDa | 2633 |
| COL15A1 | collagen; type XV; alpha 1 | 1306 |
| LIMS1 | LIM and senescent cell antigen-like domains 1 | 3987 |
| PLXDC1 | plexin domain containing 1 | 57125 |
| LOXL2 | lysyl oxidase-like 2 | 4017 |
| HOMER1 | homer homolog 1 (Drosophila) | 9456 |
| TRPC1 | transient receptor potential cation channel; subfamily C; member 1 | 7220 |
| ZNF532 | zinc finger protein 532 | 55205 |
| DCN | decorin | 1634 |
| NRIP3 | nuclear receptor interacting protein 3 | 56675 |
| SPOCK1 | sparc/osteonectin; cwcv and kazal-like domains proteoglycan (testican) 1 | 6695 |
| PRRX1 | paired related homeobox 1 | 5396 |
| PXDN | peroxidasin homolog (Drosophila) | 7837 |
| TNC | tenascin C (hexabrachion) | 3371 |
| HK3 | hexokinase 3 (white cell) | 3101 |
| LOX | lysyl oxidase | 4015 |
| GALNACT-2 | chondroitin sulfate GalNAcT-2 | 55454 |
| FRMD6 | FERM domain containing 6 | 122786 |
| NFKBIE | nuclear factor of kappa light polypeptide gene enhancer in B-cells inhibitor; epsilon | 4794 |
| GUCY1B3 | guanylate cyclase 1; soluble; beta 3 | 2983 |
| SEPT4 | septin 4 | 5414 |
| CHSY1 | carbohydrate (chondroitin) synthase 1 | 22856 |
| LRP12 | low density lipoprotein-related protein 12 | 29967 |
| DRAM | damage-regulated autophagy modulator | 55332 |
| COL7A1 | collagen; type VII; alpha 1 (epidermolysis bullosa; dystrophic; dominant and recessive) | 1294 |
| IL8 | interleukin 8 | 3576 |
| PLCL1 | phospholipase C-like 1 | 5334 |
| LOC653441 | polyhomeotic homolog 1 (Drosophila), similar to polyhomeotic 1-like | 1911, 653441 |
| LY6E | lymphocyte antigen 6 complex; locus E | 4061 |
| COL4A1 | collagen; type IV; alpha 1 | 1282 |
| INDO | indoleamine-pyrrole 2;3 dioxygenase | 3620 |
| MYL9 | myosin; light chain 9; regulatory | 10398 |
| RASSF8 | Ras association (RalGDS/AF-6) domain family 8 | 11228 |
| CLIC4 | chloride intracellular channel 4 | 25932 |
| RAB31 | RAB31; member RAS oncogene family | 11031 |
| LUM | lumican | 4060 |
| MMP2 | matrix metallopeptidase 2 (gelatinase A; 72kDa gelatinase; 72kDa type IV collagenase) | 4313 |
| VCAN | versican | 1462 |
| TIMP2 | TIMP metallopeptidase inhibitor 2 | 7077 |
| GPC1 | glypican 1 | 2817 |
| TNFAIP6 | tumor necrosis factor; alpha-induced protein 6 | 7130 |
| WISP1 | WNT1 inducible signaling pathway protein 1 | 8840 |
| PDGFB | platelet-derived growth factor beta polypeptide (simian sarcoma viral (v-sis) oncogene homolog) | 5155 |
| AKT3 | V-akt murine thymoma viral oncogene homolog 3 (protein kinase B; gamma) | 10000 |
| COL1A1 | collagen; type I; alpha 1 | 1277 |
| ENAH | enabled homolog (Drosophila) | 55740 |
| PTPN11 | protein tyrosine phosphatase; non-receptor type 11 (Noonan syndrome 1) | 5781 |
| GPR109B | G protein-coupled receptor 109B | 8843 |
| ADAM12 | ADAM metallopeptidase domain 12 (meltrin alpha) | 8038 |
| LOC619208 | hypothetical protein LOC619208 | 619208 |
| DNAJA1 | DnaJ (Hsp40) homolog; subfamily A; member 1 | 3301 |
| PANX1 | pannexin 1 | 24145 |
| DTX3 | deltex 3 homolog (Drosophila) | 196403 |
| NXT1 | NTF2-like export factor 1 | 29107 |
| FLJ39378 | hypothetical protein FLJ39378 | 353116 |
| NAPB | N-ethylmaleimide-sensitive factor attachment protein; beta | 63908 |
| CEBPB | CCAAT/enhancer binding protein (C/EBP); beta | 1051 |
| IKIP | IKK interacting protein | 121457 |
| ANTXR1 | anthrax toxin receptor 1 | 84168 |
| RIPK2 | receptor-interacting serine-threonine kinase 2 | 8767 |
| STAT1 | signal transducer and activator of transcription 1; 91kDa | 6772 |
| PDGFC | platelet derived growth factor C | 56034 |
| ISLR | immunoglobulin superfamily containing leucine-rich repeat | 3671 |
| HIP1 | Huntingtin interacting protein 1 | 3092 |
| AJAP1 | adherens junction associated protein 1 | 55966 |
| SPARC | secreted protein; acidic; cysteine-rich (osteonectin) | 6678 |
| VCAM1 | vascular cell adhesion molecule 1 | 7412 |
| KIF1B | Kinesin family member 1B | 23095 |
| PRKCDBP | protein kinase C; delta binding protein | 112464 |
| PAPPA | pregnancy-associated plasma protein A; pappalysin 1 | 5069 |
| FADS3 | fatty acid desaturase 3 | 3995 |
| LTBP2 | latent transforming growth factor beta binding protein 2 | 4053 |
| LHFP | lipoma HMGIC fusion partner | 10186 |
| SLC39A6 | solute carrier family 39 (zinc transporter); member 6 | 25800 |
| QKI | quaking homolog; KH domain RNA binding (mouse) | 9444 |
| TIMP2 | TIMP metallopeptidase inhibitor 2 | 7077 |
| FAM38B | family with sequence similarity 38; member B | 63895 |
| ZNF521 | zinc finger protein 521 | 25925 |
| MMP3 | matrix metallopeptidase 3 (stromelysin 1; progelatinase) | 4314 |
| COL4A2 | collagen; type IV; alpha 2 | 1284 |
| SLC38A6 | solute carrier family 38; member 6 | 145389 |
| GJA7 | gap junction protein; alpha 7; 45kDa | 10052 |
| SLC35B4 | solute carrier family 35; member B4 | 84912 |
| MRAS | muscle RAS oncogene homolog | 22808 |
| RECQL | RecQ protein-like (DNA helicase Q1-like) | 5965 |
| FCGR1A | Fc fragment of IgG; high affinity Ia; receptor (CD64) | 2209 |
| SDC2 | syndecan 2 | 6383 |
| HTRA3 | HtrA serine peptidase 3 | 94031 |
| PARP14 | poly (ADP-ribose) polymerase family; member 14 | 54625 |
| HS3ST3A1 | heparan sulfate (glucosamine) 3-O-sulfotransferase 3A1 | 9955 |
| EFEMP2 | EGF-containing fibulin-like extracellular matrix protein 2 | 30008 |

Supplementary Table 2. The top 200 genes negatively correlated with UBD.

| Gene Symbol | Gene Title | Entrez Gene |
| --- | --- | --- |
| MOGAT2 | monoacylglycerol O-acyltransferase 2 | 80168 |
| STARD5 | StAR-related lipid transfer (START) domain containing 5 | 80765 |
| CD300LG | CD300 molecule-like family member g | 146894 |
| PTPN18 | protein tyrosine phosphatase; non-receptor type 18 (brain-derived) | 26469 |
| RASAL1 | RAS protein activator like 1 (GAP1 like) | 8437 |
| FAM22A | family with sequence similarity 22; member A, family with sequence similarity 22; member B, family with sequence similarity 22; member C | 727807, 728118, 729262 |
| DNAJC4 | DnaJ (Hsp40) homolog; subfamily C; member 4 | 3338 |
| GNG13 | guanine nucleotide binding protein (G protein); gamma 13 | 51764 |
| PHKB | phosphorylase kinase; beta | 5257 |
| FAM98C | family with sequence similarity 98; member C | 147965 |
| NOSTRIN | nitric oxide synthase trafficker | 115677 |
| IFT172 | intraflagellar transport 172 homolog (Chlamydomonas) | 26160 |
| PSORS1C1 | psoriasis susceptibility 1 candidate 1 | 170679 |
| ZNF488 | zinc finger protein 488 | 118738 |
| SULT1A3 | sulfotransferase family; cytosolic; 1A; phenol-preferring; member 3, sulfotransferase family; cytosolic; 1A; phenol-preferring; member 4 | 445329, 6818 |
| ZBTB7C | zinc finger and BTB domain containing 7C | 201501 |
| PPP2R5A | protein phosphatase 2; regulatory subunit B'; alpha isoform | 5525 |
| CLINT1 | clathrin interactor 1 | 9685 |
| PCDHGB5 | protocadherin gamma subfamily B; 5 | 56101 |
| VILL | villin-like | 50853 |
| MARVELD3 | MARVEL domain containing 3 | 91862 |
| PAK4 | p21(CDKN1A)-activated kinase 4 | 10298 |
| CROCCL1 | ciliary rootlet coiled-coil; rootletin-like 1 | 84809 |
| PCSK7 | proprotein convertase subtilisin/kexin type 7 | 9159 |
| SEMA4G | sema domain; immunoglobulin domain (Ig); transmembrane domain (TM) and short cytoplasmic domain; (semaphorin) 4G | 57715 |
| CDC42EP5 | CDC42 effector protein (Rho GTPase binding) 5 | 148170 |
| FCGBP | Fc fragment of IgG binding protein | 8857 |
| GRK5 | G protein-coupled receptor kinase 5 | 2869 |
| CORO2A | coronin; actin binding protein; 2A | 7464 |
| TMEM135 | transmembrane protein 135 | 65084 |
| ZNF440 | zinc finger protein 440 | 126070 |
| PDXDC1 | pyridoxal-dependent decarboxylase domain containing 1 | 23042 |
| SCAMP2 | secretory carrier membrane protein 2 | 10066 |
| CRTC1 | CREB regulated transcription coactivator 1 | 23373 |
| PROM2 | prominin 2 | 150696 |
| CALML4 | calmodulin-like 4 | 91860 |
| CTSE | cathepsin E | 1510 |
| DAB2IP | DAB2 interacting protein | 153090 |
| SDHD | succinate dehydrogenase complex; subunit D; integral membrane protein | 6392 |
| EXPH5 | exophilin 5 | 23086 |
| SLC29A4 | solute carrier family 29 (nucleoside transporters); member 4 | 222962 |
| TMC4 | transmembrane channel-like 4 | 147798 |
| PRUNE2 | prune homolog 2 (Drosophila) | 158471 |
| KCNK6 | potassium channel; subfamily K; member 6 | 9424 |
| SFRS2B | splicing factor; arginine/serine-rich 2B | 10929 |
| KLHDC7A | kelch domain containing 7A | 127707 |
| SULT1A1 | sulfotransferase family; cytosolic; 1A; phenol-preferring; member 1 | 6817 |
| PSG5 | pregnancy specific beta-1-glycoprotein 5 | 5673 |
| RPH3A | rabphilin 3A homolog (mouse) | 22895 |
| RAB25 | RAB25; member RAS oncogene family | 57111 |
| CYP2C9 | Cytochrome P450; family 2; subfamily C; polypeptide 9 | 1559 |
| HSD11B2 | hydroxysteroid (11-beta) dehydrogenase 2 | 3291 |
| HIST1H4I | histone cluster 1; H4i | 8294 |
| SULT1A2 | sulfotransferase family; cytosolic; 1A; phenol-preferring; member 2 | 6799 |
| FEV | FEV (ETS oncogene family) | 54738 |
| ATP5L | ATP synthase; H+ transporting; mitochondrial F0 complex; subunit G | 10632 |
| LGR4 | leucine-rich repeat-containing G protein-coupled receptor 4 | 55366 |
| ERN2 | endoplasmic reticulum to nucleus signaling 2 | 10595 |
| CABP1 | calcium binding protein 1 | 9478 |
| PAK1 | p21/Cdc42/Rac1-activated kinase 1 (STE20 homolog; yeast) | 5058 |
| FARP2 | FERM; RhoGEF and pleckstrin domain protein 2 | 9855 |
| DCI | dodecenoyl-Coenzyme A delta isomerase (3;2 trans-enoyl-Coenzyme A isomerase) | 1632 |
| OBP2A | odorant binding protein 2A, odorant binding protein 2B | 29989, 29991 |
| RILP | Rab interacting lysosomal protein | 83547 |
| TMEM131 | transmembrane protein 131 | 23505 |
| GDPD2 | glycerophosphodiester phosphodiesterase domain containing 2 | 54857 |
| RICS | Rho GTPase-activating protein | 9743 |
| FAM22F | family with sequence similarity 22; member F | 54754 |
| PAX8 | paired box 8 | 7849 |
| TMPRSS4 | transmembrane protease; serine 4 | 56649 |
| ITM2C | integral membrane protein 2C | 81618 |
| ALPI | alkaline phosphatase; intestinal | 248 |
| PLA2G6 | phospholipase A2; group VI (cytosolic; calcium-independent) | 8398 |
| PLA2G6 | phospholipase A2; group VI (cytosolic; calcium-independent) | 8398 |
| BARX2 | BARX homeobox 2 | 8538 |
| NPHP1 | nephronophthisis 1 (juvenile) | 4867 |
| SYTL1 | synaptotagmin-like 1 | 84958 |
| AUH | AU RNA binding protein/enoyl-Coenzyme A hydratase | 549 |
| SGSM3 | small G protein signaling modulator 3 | 27352 |
| NR3C2 | nuclear receptor subfamily 3; group C; member 2 | 4306 |
| TRIM73 | tripartite motif-containing 73, tripartite motif-containing 74 | 375593, 378108 |
| LOH11CR2A | loss of heterozygosity; 11; chromosomal region 2; gene A | 4013 |
| RGS13 | regulator of G-protein signaling 13 | 6003 |
| NRARP | Notch-regulated ankyrin repeat protein | 441478 |
| ROGDI | rogdi homolog (Drosophila) | 79641 |
| FOXK1 | Forkhead box K1 | 221937 |
| DDEF2 | development and differentiation enhancing factor 2 | 8853 |
| GOLPH3L | golgi phosphoprotein 3-like | 55204 |
| ZNF33B | zinc finger protein 33B | 7582 |
| RALGPS1 | Ral GEF with PH domain and SH3 binding motif 1 | 9649 |
| ERGIC1 | endoplasmic reticulum-golgi intermediate compartment (ERGIC) 1 | 57222 |
| OR9A1P | olfactory receptor; family 9; subfamily A; member 1 pseudogene | 26495 |
| ETFDH | electron-transferring-flavoprotein dehydrogenase | 2110 |
| NIT1 | Nitrilase 1 | 4817 |
| CHST5 | carbohydrate (N-acetylglucosamine 6-O) sulfotransferase 5 | 23563 |
| PEX11B | peroxisomal biogenesis factor 11B | 8799 |
| TIRAP | toll-interleukin 1 receptor (TIR) domain containing adaptor protein | 114609 |
| ENDOD1 | endonuclease domain containing 1 | 23052 |
| TAS2R1 | taste receptor; type 2; member 1 | 50834 |
| GALNT3 | UDP-N-acetyl-alpha-D-galactosamine:polypeptide N-acetylgalactosaminyltransferase 3 (GalNAc-T3) | 2591 |
| HEXIM1 | Hexamethylene bis-acetamide inducible 1 | 10614 |
| AGR3 | anterior gradient homolog 3 (Xenopus laevis) | 155465 |
| SEC22B | SEC22 vesicle trafficking protein homolog B (S. cerevisiae) | 9554 |
| ALDH1L1 | aldehyde dehydrogenase 1 family; member L1 | 10840 |
| RTDR1 | Rhabdoid tumor deletion region gene 1 | 27156 |
| MGC24125 | hypothetical protein MGC24125 | 439935 |
| TMC6 | Transmembrane channel-like 6 | 11322 |
| ARHGAP26 | Rho GTPase activating protein 26 | 23092 |
| ATP10B | ATPase; Class V; type 10B | 23120 |
| ANKS4B | ankyrin repeat and sterile alpha motif domain containing 4B | 257629 |
| NEDD4L | neural precursor cell expressed; developmentally down-regulated 4-like | 23327 |
| FDX1 | ferredoxin 1 | 2230 |
| GALM | Galactose mutarotase (aldose 1-epimerase) | 130589 |
| SDHALP1 | succinate dehydrogenase complex; subunit A; flavoprotein pseudogene 1 | 255812 |
| NPDC1 | neural proliferation; differentiation and control; 1 | 56654 |
| HIBCH | 3-hydroxyisobutyryl-Coenzyme A hydrolase | 26275 |
| LNX1 | ligand of numb-protein X 1 | 84708 |
| NOXA1 | NADPH oxidase activator 1 | 10811 |
| ZNF763 | zinc finger protein 763 | 284390 |
| CANT1 | calcium activated nucleotidase 1 | 124583 |
| ATP8B1 | ATPase; Class I; type 8B; member 1 | 5205 |
| FA2H | fatty acid 2-hydroxylase | 79152 |
| GMPPB | GDP-mannose pyrophosphorylase B | 29925 |
| LIMA1 | LIM domain and actin binding 1 | 51474 |
| SRD5A2L | steroid 5 alpha-reductase 2-like | 79644 |
| ST6GALNAC1 | ST6 (alpha-N-acetyl-neuraminyl-2;3-beta-galactosyl-1;3)-N-acetylgalactosaminide alpha-2;6-sialyltransferase 1 | 55808 |
| KRCC1 | lysine-rich coiled-coil 1 | 51315 |
| CNGA1 | cyclic nucleotide gated channel alpha 1 | 1259 |
| STAB2 | stabilin 2 | 55576 |
| KALRN | kalirin; RhoGEF kinase | 8997 |
| GIPR | gastric inhibitory polypeptide receptor | 2696 |
| LAT2 | linker for activation of T cells family; member 2 | 7462 |
| CMBL | carboxymethylenebutenolidase homolog (Pseudomonas) | 134147 |
| SYNGAP1 | synaptic Ras GTPase activating protein 1 homolog (rat), zinc finger and BTB domain containing 9 | 221504, 8831 |
| SH3RF2 | SH3 domain containing ring finger 2 | 153769 |
| SEC14L2 | SEC14-like 2 (S. cerevisiae) | 23541 |
| GOLM1 | golgi membrane protein 1 | 51280 |
| HRBL | HIV-1 Rev binding protein-like | 3268 |
| FABP1 | Fatty acid binding protein 1; liver | 2168 |
| GBA3 | glucosidase; beta; acid 3 (cytosolic) | 57733 |
| TTC12 | tetratricopeptide repeat domain 12 | 54970 |
| MRPS14 | mitochondrial ribosomal protein S14 | 63931 |
| KCNK1 | potassium channel; subfamily K; member 1 | 3775 |
| TAPT1 | transmembrane anterior posterior transformation 1 | 202018 |
| ZNF575 | zinc finger protein 575 | 284346 |
| VSIG2 | V-set and immunoglobulin domain containing 2 | 23584 |
| RABGAP1L | RAB GTPase activating protein 1-like | 9910 |
| DUSP1 | Dual specificity phosphatase 1 | 1843 |
| ATP2C2 | ATPase; Ca++ transporting; type 2C; member 2 | 9914 |
| ETHE1 | ethylmalonic encephalopathy 1 | 23474 |
| CYP4F12 | cytochrome P450; family 4; subfamily F; polypeptide 12 | 66002 |
| ZNF19 | zinc finger protein 19 | 7567 |
| TMEM143 | transmembrane protein 143 | 55260 |
| HADHA | hydroxyacyl-Coenzyme A dehydrogenase/3-ketoacyl-Coenzyme A thiolase/enoyl-Coenzyme A hydratase (trifunctional protein); alpha subunit | 3030 |
| ALKBH7 | alkB; alkylation repair homolog 7 (E. coli) | 84266 |
| IL18 | interleukin 18 (interferon-gamma-inducing factor) | 3606 |
| KIAA0141 | KIAA0141 | 9812 |
| AKR7A3 | aldo-keto reductase family 7; member A3 (aflatoxin aldehyde reductase) | 22977 |
| AGR2 | anterior gradient homolog 2 (Xenopus laevis) | 10551 |
| SLC25A23 | solute carrier family 25 (mitochondrial carrier; phosphate carrier); member 23 | 79085 |
| ELF3 | E74-like factor 3 (ets domain transcription factor; epithelial-specific ) | 1999 |
| MMP28 | matrix metallopeptidase 28 | 79148 |
| ARV1 | ARV1 homolog (S. cerevisiae) | 64801 |
| PLCE1 | phospholipase C; epsilon 1 | 51196 |
| PFKFB2 | 6-phosphofructo-2-kinase/fructose-2;6-biphosphatase 2 | 5208 |
| CACNG6 | calcium channel; voltage-dependent; gamma subunit 6 | 59285 |
| PDZD3 | PDZ domain containing 3 | 79849 |
| PLEKHA6 | pleckstrin homology domain containing; family A member 6 | 22874 |
| ACTR1B | ARP1 actin-related protein 1 homolog B; centractin beta (yeast) | 10120 |
| AGPAT7 | 1-acylglycerol-3-phosphate O-acyltransferase 7 (lysophosphatidic acid acyltransferase; eta) | 254531 |
| VIPR1 | vasoactive intestinal peptide receptor 1 | 7433 |
| TMBIM1 | transmembrane BAX inhibitor motif containing 1 | 64114 |
| CYP3A4 | cytochrome P450; family 3; subfamily A; polypeptide 4 | 1576 |
| SOHLH1 | spermatogenesis and oogenesis specific basic helix-loop-helix 1 | 402381 |
| BAIAP2L2 | BAI1-associated protein 2-like 2 | 80115 |
| MYO7B | myosin VIIB | 4648 |
| DHRS1 | dehydrogenase/reductase (SDR family) member 1 | 115817 |
| ATP2A3 | ATPase; Ca++ transporting; ubiquitous | 489 |
| KIAA0515 | KIAA0515 | 84726 |
| CCNG1 | cyclin G1 | 900 |
| SMPD3 | sphingomyelin phosphodiesterase 3; neutral membrane (neutral sphingomyelinase II) | 55512 |
| SLC35A1 | solute carrier family 35 (CMP-sialic acid transporter); member A1 | 10559 |
| DNM2 | dynamin 2 | 1785 |
| DKFZP434H168 | DKFZP434H168 protein | 26077 |
| ZNF287 | zinc finger protein 287 | 57336 |
| EML2 | echinoderm microtubule associated protein like 2 | 24139 |
| UGT1A8 | UDP glucuronosyltransferase 1 family; polypeptide A8, UDP glucuronosyltransferase 1 family; polypeptide A9 | 54576, 54600 |
| CAMK2D | calcium/calmodulin-dependent protein kinase (CaM kinase) II delta | 817 |
| GPR126 | G protein-coupled receptor 126 | 57211 |
| CAPN5 | calpain 5 | 726 |
| AP1M2 | adaptor-related protein complex 1; mu 2 subunit | 10053 |
| SPIRE2 | spire homolog 2 (Drosophila) | 84501 |
| COQ4 | coenzyme Q4 homolog (S. cerevisiae) | 51117 |
| ECHDC2 | Enoyl Coenzyme A hydratase domain containing 2 | 55268 |
| RAB1A | RAB1A; member RAS oncogene family | 5861 |
| PLLP | plasma membrane proteolipid (plasmolipin) | 51090 |
| ATP5S | ATP synthase; H+ transporting; mitochondrial F0 complex; subunit s (factor B) | 27109 |
| EIF2AK3 | eukaryotic translation initiation factor 2-alpha kinase 3 | 9451 |
| TPD52 | tumor protein D52 | 7163 |
| CLRN3 | clarin 3 | 119467 |

Supplementary Table 3: (A) UBD negative correlated genes and (B)UBD co-upregulated genes in terms of biological processes.

(A)

| GO molecular function complete | Fold Enrichment | Raw P-value |
| --- | --- | --- |
| enoyl-CoA hydratase activity (GO:0004300) | 41.38 | 7.57E-06 |

(B)

| GO molecular function complete | Fold Enrichment | Raw P-value |
| --- | --- | --- |
| platelet-derived growth factor binding (GO:0048407) | 76.4 | 3.75E-12 |
| extracellular matrix structural constituent conferring tensile strength (GO:0030020) | 38.43 | 2.79E-18 |
| IgG binding (GO:0019864) | 38.2 | 9.65E-06 |
| collagen binding (GO:0005518) | 19.79 | 7.89E-13 |
| extracellular matrix structural constituent (GO:0005201) | 19.43 | 7.91E-30 |
| extracellular matrix structural constituent conferring compression resistance (GO:0030021) | 19.1 | 9.74E-05 |
| immunoglobulin binding (GO:0019865) | 17.51 | 1.31E-04 |
| extracellular matrix binding (GO:0050840) | 13.13 | 2.11E-06 |
| growth factor binding (GO:0019838) | 10.19 | 1.44E-09 |
| heparin binding (GO:0008201) | 8.5 | 2.95E-09 |
| glycosaminoglycan binding (GO:0005539) | 8.28 | 6.04E-12 |
| metalloendopeptidase activity (GO:0004222) | 6.45 | 1.52E-04 |
| structural molecule activity (GO:0005198) | 5.62 | 4.70E-18 |
| sulfur compound binding (GO:1901681) | 5.41 | 5.97E-07 |
| G protein-coupled receptor binding (GO:0001664) | 4.32 | 3.35E-05 |
| protein-containing complex binding (GO:0044877) | 2.85 | 2.79E-08 |
| signaling receptor binding (GO:0005102) | 2.44 | 5.80E-07 |
| carbohydrate derivative binding (GO:0097367) | 2.17 | 5.03E-07 |
| protein binding (GO:0005515) | 1.22 | 1.32E-06 |
| binding (GO:0005488) | 1.13 | 5.49E-05 |
| molecular_function (GO:0003674) | 1.1 | 1.68E-05 |
| Unclassified (UNCLASSIFIED) | 0.23 | 1.68E-05 |
